# Supplementary material for: Using Network Pharmacology and Animal Experiment to Investigate the Therapeutic Mechanisms of Polydatin against Vincristine-Induced Neuropathic Pain
Source: Hindawi journal article supplement (doi:10.1155/2022/6010952), 2022-10-14
Supplement: f3 [file 6010952.f3.pdf]

| Ontology | ID       | Description                                          | GeneRatio | BgRatio  | pvalue   | p.adjust | qvalue   |
|----------|----------|------------------------------------------------------|-----------|----------|----------|----------|----------|
| KEGG     | hsa04657 | IL-17 signaling pathway                              | 13/46     | 94/8076  | 2.27e-15 | 4.78e-13 | 1.29e-13 |
| KEGG     | hsa04933 | AGE-RAGE signaling pathway in diabetic complications | 13/46     | 100/8076 | 5.25e-15 | 5.51e-13 | 1.49e-13 |
| KEGG     | hsa05163 | Human cytomegalovirus infection                      | 14/46     | 225/8076 | 1.24e-11 | 8.65e-10 | 2.34e-10 |
| KEGG     | hsa04218 | Cellular senescence                                  | 12/46     | 156/8076 | 3.90e-11 | 2.05e-09 | 5.54e-10 |
| KEGG     | hsa05142 | Chagas disease                                       | 10/46     | 102/8076 | 1.84e-10 | 7.36e-09 | 1.99e-09 |
| KEGG     | hsa05418 | Fluid shear stress and atherosclerosis               | 11/46     | 139/8076 | 2.10e-10 | 7.36e-09 | 1.99e-09 |
| KEGG     | hsa05140 | Leishmaniasis                                        | 9/46      | 77/8076  | 3.34e-10 | 1.00e-08 | 2.72e-09 |
| KEGG     | hsa05210 | Colorectal cancer                                    | 9/46      | 86/8076  | 9.18e-10 | 2.41e-08 | 6.52e-09 |
| KEGG     | hsa04068 | FoxO signaling pathway                               | 10/46     | 131/8076 | 2.22e-09 | 4.93e-08 | 1.34e-08 |
| KEGG     | hsa05219 | Bladder cancer                                       | 7/46      | 41/8076  | 2.35e-09 | 4.93e-08 | 1.34e-08 |
| KEGG     | hsa04621 | NOD-like receptor signaling pathway                  | 11/46     | 181/8076 | 3.57e-09 | 6.81e-08 | 1.84e-08 |
| KEGG     | hsa04659 | Th17 cell differentiation                            | 9/46      | 107/8076 | 6.56e-09 | 1.08e-07 | 2.94e-08 |
| KEGG     | hsa05131 | Shigellosis                                          | 12/46     | 246/8076 | 7.58e-09 | 1.08e-07 | 2.94e-08 |
| KEGG     | hsa04066 | HIF-1 signaling pathway                              | 9/46      | 109/8076 | 7.74e-09 | 1.08e-07 | 2.94e-08 |
| KEGG     | hsa05133 | Pertussis                                            | 8/46      | 76/8076  | 8.27e-09 | 1.08e-07 | 2.94e-08 |
