# Supplementary material for: Using Network Pharmacology and Animal Experiment to Investigate the Therapeutic Mechanisms of Polydatin against Vincristine-Induced Neuropathic Pain
Source: Mediators Inflamm. 2022 Oct 14;2022:6010952. doi: 10.1155/2022/6010952 (PMC9587674; doi:10.1155/2022/6010952)
Supplement: Supplementary 1 — Supplementary file 1: the potential targets of polydatin in the treatment of vincristine-induced neurotoxicity. [file 6010952.f1.xlsx]

## Sheet: vin
VIN-related genes
ABCC1
ABCB1
CASP3
ABCC2
BCL2
NGF
TNF
FSHB
BAX
SOD2
TP53
CAT
CDKN1A
AKT1
HMOX1
IL6
ABCC10
CASP8
F3
GSTM1
HMGB1
IL1B
LHB
MGMT
NR1I2
RB1
ABCA12
ABCB1A
ABCG2
ACHE
AKT2
AMH
ATF6
AURKA
BCL2L1
BNIP3
CCL2
CCNB1
CTNNB1
CYP3A5
EGR1
EIF2AK3
ERN1
FOXO1
GADD45A
GCLM
GFAP
GSTP1
H2AX
HSPA5
HTR2A
ICAM1
IGF1
IL2
MAPRE1
MAPRE3
MCL1
MDM2
MYC
MYCN
NFE2L2
NPPB
NQO1
PARP1
POLR1H
PPP1R15A
RELA
S100A8
SERPINE1
SQSTM1
TANK
TIMP1
TTC9C
TUBA1B
TUBA4A
TUBB4B
TUBG1
VCAM1
ZNF207
AAMDC
ABCA1
ABCA4
ABCA5
ABCA8
ABCB1B
ABCB4
ABCB6
ABCC3
ABCC4
ABCC5
ABCC6
ABCD3
ABCG1
ABCG4
ABHD11
ABTB2
ACAD9
ACKR3
ACTR2
ADAT2
ADGRF4
ADRB1
ADRB2
AGBL3
AHSA2P
AIM2
AK1
AK3
AKAP10
ALDOC
ALMS1
ALPK2
ANAPC5
ANKDD1A
ANKHD1
ANKRA2
ANKRD13C
ANKRD33B
ANKRD37
ANP32E
ANXA1
ANXA2
AP1S2
APEX2
APLN
APOD
APOLD1
AQP9
ARAP2
ARF1
ARHGAP15
ARHGAP18
ARHGAP5
ARHGEF6
ARHGEF7
ARID2
ARID4B
ARL5A
ARL5B
ARL6IP1
ARMC8
ASPM
ASXL1
ATAD2
ATF3
ATF5
ATP2B4
ATP5F1C
ATP6V0E1
ATP7A
ATP8A1
AURKB
AVP
B3GALT6
B3GNT5
BAK1
BAMBI
BARD1
BASP1
BATF
BCAT1
BCL2A1
BCLAF1
BCOR
BDKRB1
BDKRB2
BIRC2
BIRC3
BLM
BMP2
BNIP3L
BORCS7
BRIP1
BRWD1
BTG1
BTG2
BTG4
BUB3
C12ORF54
C15ORF39
C1GALT1
C1ORF74
C6ORF58
CABLES2
CACNB2
CALD1
CALM2
CALU
CAMK2D
CAMKK1
CAPG
CARHSP1
CASP1
CASP6
CBX3
CBX5
CCAR1
CCDC12
CCDC186
CCDC198
CCDC32
CCDC82
CCHCR1
CCL1
CCL20
CCL22
CCL4
CCL5
CCN2
CCNB2
CCNE1
CCNE2
CCNL1
CD109
CD14
CD200
CD274
CD36
CD40
CD44
CD48
CD55
CD58
CD69
CD80
CD83
CD86
CDC42EP3
CDC42EP4
CDC42SE1
CDC6
CDCA3
CDCA7
CDH1
CDK1
CDK10
CDK19
CDK2
CDKN2A
CDKN2C
CEACAM1
CEBPB
CELF1
CENPC1
CENPF
CENPI
CENPU
CEP135
CES5A
CETP
CFLAR
CHD1L
CHEK2
CHM
CHML
CHTF18
CIAPIN1
CIRBP
CLASP2
CLEC2D
CLIC2
CLSPN
CNKSR2
CNOT3
CNOT6L
CNTLN
COL15A1
COL1A2
COL3A1
COL5A2
COMTD1
CP
CPEB2
CPNE3
CPSF6
CREBBP
CREBRF
CREBZF
CRTAP
CRTC3
CSAD
CSF2
CSNK1A1
CSNK1G1
CSTA
CSTF1
CTC1
CTH
CTNNAL1
CUL4A
CXCL10
CXCL11
CXCL8
CXCL9
CYLD
CYP2C8
CYP2C9
CYP3A4
CYP4F2
CYP4F3
CYP4V2
CYSLTR1
DAAM1
DCAF8
DCN
DCUN1D1
DCUN1D4
DDIT3
DDX50
DDX52
DDX60
DENND5A
DGCR8
DHFR
DHRS11
DHRS2
DHRS7
DIABLO
DIDO1
DIP2A
DMD
DNA2
DNAJB1
DNAJC15
DNAJC7
DNASE1L3
DNMBP
DOCK4
DOCK8
DOK4
DONSON
DPP4
DPYD
DRAM1
DTL
DUSP1
DUSP10
DUSP16
DUSP2
DUSP4
DYNLT2
E2F8
EBF1
EBLN2
EDNRB
EFNA4
EGFL6
EGR3
EHBP1L1
EIF1
EIF1AD
EIF3B
EIF3M
EIF4A1
EIF4A2
ELF3
ELK3
EME2
EML6
ENOX1
ENPP2
ENSA
ENTPD2
EOMES
EPG5
EPHB1
EPHX1
EPM2AIP1
EPOR
EPRS
EPSTI1
ERAP2
ERICH3
ESCO2
ESD
ESM1
ESR1
EVC
EXO1
EXOG
EXT1
F2
FAM111B
FAM13B
FAM13C
FAM171B
FAM174A
FAM71F1
FAM76B
FAM81A
FAM83D
FANCF
FANCG
FAS
FASLG
FASTKD2
FBXL20
FBXL4
FBXO33
FBXO5
FBXO9
FCGR2B
FDFT1
FERMT2
FFAR2
FGR
FLOT2
FLT1
FMNL3
FNBP1
FNBP4
FOS
FOSL2
FOXK2
FOXP1
FRY
FSCN1
FSD1L
FUBP1
FUT11
G3BP1
GADD45B
GADD45G
GART
GAS7
GBP1
GBP2
GBP6
GCLC
GDF15
GFI1
GFM1
GJC1
GLI1
GLIPR1
GMFB
GMPPB
GNA15
GNG2
GOLGA2P5
GOLGA8A
GOLGA8B
GON4L
GOPC
GPATCH11
GPATCH2
GPATCH2L
GPBP1L1
GPC3
GPD2
GPNMB
GPR132
GPR137B
GPR180
GPR55
GPR63
GPR84
GRAMD2B
GRAP2
GSPT1
GTF3C3
GTPBP3
H2AC6
H2BC10
H2BC12
H2BC21
H2BC3
H2BC4
H2BC5
H2BC6
H2BC7
H2BS1
H3C7
H4C3
HAMP
HAUS2
HBB
HBD
HDAC1
HDAC4
HDAC9
HDHD3
HECTD4
HELLS
HEPH
HHAT
HIC1
HILPDA
HINT1
HINT3
HIVEP3
HLA-DRB4
HLF
HMCN1
HMGA2
HMGN5
HNRNPA2B1
HNRNPD
HNRNPDL
HNRNPR
HNRNPU
HOOK1
HOOK3
HOXB7
HPDL
HRAS
HS2ST1
HSPA14
HSPB11
HSPB2
HSPD1
HYLS1
ICAM4
ID2
ID3
IER3
IFI44
IFI44L
IFIH1
IFIT2
IFNG
IFRD1
IFT20
IFT43
IGHG1
IGHM
IGKC
IGKV4-1
IKZF2
IL10RA
IL15
IL17RB
IL1R1
IL23A
IL36G
IL7
ILDR1
ILDR2
IMPA2
INA
ING2
INHA
INHBE
INPP1
INPP4B
INTS11
INTS5
IPO5
IQGAP2
IRAK2
IREB2
IRF1
ISG20
ISLR
ITGA1
ITGA4
ITGAM
ITGB1BP2
ITGB1BP3
ITGB7
ITGB8
ITPKB
ITPR1
ITPRID2
ITPRIPL1
IVL
IVNS1ABP
JADE2
JCHAIN
JMJD1C
JPT1
JUN
KAT2B
KCMF1
KCNA5
KCNMB1
KCNN2
KDM2B
KDSR
KIR3DX1
KLF12
KLF6
KLHL14
KLHL23
KLHL28
KMT5B
KPNA2
KRT23
KRT7
KYNU
LACTB2
LAIR2
LAMA2
LAMP3
LARP1B
LBH
LCE1B
LCOR
LCORL
LCP2
LDLRAD4
LDLRAP1
LENG8
LIF
LILRB1
LIMA1
LIMS1
LINC00528
LINC01588
LMNA
LNPEP
LRBA
LRCH3
LRP8
LRRC8C
LRRCC1
LRRFIP1
LTA
LTO1
LUM
LY96
LZTFL1
LZTS2
MACF1
MACIR
MAFF
MAGT1
MAN2A1
MANEA
MAP1LC3B
MAP3K1
MAP3K7
MAP3K8
MAP4K4
MAPKBP1
MARCHF7
MARCKS
MARS1
MARS2
MATN2
MATR3
MAX
MBD4
MBNL3
MBTD1
MCCC2
MCM4
MCMBP
MCOLN2
MDN1
MED29
MED31
METTL3
MFSD5
MFSD6
MGA
MGAT4A
MICAL3
MIR132
MIR497
MKI67
MKLN1
MKNK2
MLLT3
MMD
MND1
MPZ
MR1
MRPL30
MRPL39
MRPL50
MRPS16
MT1F
MT1G
MT1H
MT1HL1
MT1X
MT2A
MTA3
MTCP1
MTFR2
MTG2
MTHFD2L
MTRF1L
MVP
MXD1
MYH11
MYSM1
MZB1
N4BP2L2
NAA25
NAA50
NABP1
NACA
NAMPT
NAPB
NAPSB
NASP
NBN
NCBP1
NCEH1
NCF2
NCOA7
ND6
NDE1
NDUFB4
NEURL3
NFAT5
NFATC2
NFE2L1
NFE2L3
NHSL1
NINJ1
NISCH
NMNAT3
NNT
NOL12
NOL4L
NOS1
NPIPB3
NPL
NPPA
NR1H4
NR2F2
NR5A2
NRAS
NREP
NRN1
NSMCE4A
NT5E
NUDT7
NUF2
NUMB
NUP153
NXT1
OGA
OGG1
OGT
OLAH
ORAI1
OTP
OXTR
P2RX5
P2RX7
P4HA1
PABPC1L
PABPN1
PAIP1
PANK2
PAQR4
PARP2
PARP9
PATL1
PBXIP1
PCED1B
PCF11
PCGF2
PCNX1
PCNX2
PCSK7
PDCD5
PDE4B
PDK1
PDK3
PDS5B
PEA15
PELI1
PEX11B
PEX13
PFAS
PFKFB4
PGM1
PGP
PHF11
PHF6
PHTF2
PIK3C2A
PIK3R2
PILRA
PIM2
PITPNB
PKIG
PLA1A
PLA2G4C
PLAT
PLAUR
PLCXD1
PLEK
PLEKHA2
PLEKHG1
PLPP3
PM20D2
PMP22
PMS1
PNISR
PNOC
POGLUT1
POGZ
POLA1
POLD3
POLQ
POLR1B
POSTN
POU2AF1
POU2F1
PPM1A
PPP1R10
PPP1R1B
PPP1R3E
PPP4R3B
PRC1
PRIM1
PRKCD
PRKCE
PRKDC
PRLR
PRNP
PRPF4B
PRR12
PRR3
PRRG4
PSD3
PSME4
PSMG4
PSPC1
PTAFR
PTGER4
PTGR2
PTK2B
PTPN11
PTPN13
PTPN3
PTPRK
PTPRO
PTPRR
PVRIG
PXT1
PYHIN1
QRICH1
RAB11FIP1
RAB11FIP3
RAB12
RAB20
RAB21
RAB29
RAB39B
RAB8B
RAB9A
RABGGTB
RABIF
RAC2
RACK1
RAD54L
RASEF
RASSF1
RASSF4
RBBP4
RBBP8
RBL1
RBM12
RBM15
RBM17
RBM18
RBM23
RBM25
RBM4B
RBM5
RBM6
RBM8A
RCC1L
RECQL4
REL
REPS1
REV1
RFFL
RFTN1
RGL1
RGS1
RGS10
RGS16
RGS17
RHOF
RHOQ
RIF1
RIPK2
RNASE6
RNF144A
RNF19B
RNF213
RNF34
RORA
RPAIN
RPL10
RPL13
RPL17
RPL31
RPL32P3
RPL37A
RPL5
RPL6
RPL7
RPRD1A
RPS24
RPS27L
RRAGC
RRM2
RRP7A
RSKR
RSRP1
RUNX3
S100A4
S100A9
SAMHD1
SAMSN1
SASH3
SAT1
SBF2
SBNO1
SCAF11
SCAMP2
SCD5
SCLT1
SCLY
SCO2
SDCBP
SEC31B
SEC62
SELE
SELENOH
SENP1
SEPTIN6
SERINC5
SERPINB10
SERPINB2
SERPINB8
SERTAD3
SESN1
SESN2
SETBP1
SETD1B
SETD6
SFXN3
SGK1
SH3YL1
SHISA8
SIAH1
SIAH2
SIDT2
SIRPB1
SIVA1
SIX1
SKIL
SKP2
SLAMF1
SLAMF7
SLC10A2
SLC15A4
SLC16A14
SLC20A1
SLC22A23
SLC25A1
SLC25A11
SLC25A37
SLC29A1
SLC29A2
SLC2A1
SLC44A5
SLC4A7
SLC7A11
SLC9A9
SLCO4C1
SLFN13
SMAD1
SMAD2
SMAD4
SMC6
SNAPC3
SNHG10
SNHG12
SNHG3
SNHG4
SNHG7
SNN
SNORD104
SNRNP200
SNRPA1
SNRPN
SNU13
SNX11
SNX25
SNX4
SNX5
SOBP
SOCS3
SON
SOS1
SP1
SP100
SP140L
SP4
SPART
SPIC
SPIN4
SPON1
SPRED1
SPRY1
SREBF1
SREK1
SRGN
SRI
SRM
SRSF3
SRSF7
SSBP1
SSTR2
STAG1
STAMBPL1
STAT1
STIP1
STK4
STRIP2
STS
STX12
SUMF1
SUN2
SUPT20H
SUZ12
SYF2
SYNCRIP
SYNE2
SYPL2
SYTL3
TAF15
TAF1D
TAF5L
TAP1
TASOR2
TBC1D12
TBC1D27P
TBC1D4
TBC1D8B
TBX22
TCAF1
TCEA2
TCF19
TCIRG1
TDRD9
TENM2
TENT2
TENT5C
TFAP2A
TFPI
TGDS
TGFBI
TGFBR3
THADA
THBD
THBS1
THEM6
THEMIS2
THRA
TIGAR
TINAG
TIRAP
TLCD1
TLR10
TM2D1
TMCC3
TMCO6
TMEM106C
TMEM107
TMEM163
TMEM177
TMEM200A
TMEM223
TMEM267
TMEM38A
TMEM43
TMEM80
TMF1
TMX4
TNFAIP3
TNFAIP6
TNFAIP8L1
TNFRSF10B
TNFRSF17
TNFRSF19
TNFRSF9
TNFSF10
TNFSF4
TNFSF9
TNIP2
TNNI3
TNNT2
TOMM70
TOP2A
TOPBP1
TP53I3
TP53INP1
TPCN2
TPD52
TPD52L1
TPI1
TPM4
TPRG1L
TRA2A
TRAF1
TRAF3IP3
TRAPPC10
TREX1
TRIB1
TRIM13
TRIM22
TRIM29
TRIM45
TRIO
TRIR
TRP53
TRPV2
TRPV4
TSC22D1
TSEN15
TSG101
TSHZ1
TTC3
TTYH2
TUBA1C
TUBA3C
TUBA3D
TUBB
TUBB3
TUBB5
TUBGCP5
TULP4
TWF1
TXLNGY
TXNIP
TYMP
TYMS
U2SURP
UBALD2
UBAP2
UBC
UBE2C
UBE2G1
UBE2I
UBE2J1
UBR2
UBR4
UCHL1
UCP2
UGCG
UGGT2
UNC119
UPB1
UROD
USP12
USP25
USP34
USP37
VAMP2
VASP
VDR
VEGFA
VEZF1
VIT
VPS13A
VPS13D
VPS25
VPS53
VPS72
VTI1A
VWF
WDHD1
WDR17
WDR33
WDR72
WDR76
WDR90
WEE1
WNK1
WSB1
XIRP2
XPNPEP3
YPEL5
YTHDC2
YTHDF3
ZBTB10
ZBTB24
ZC3H12A
ZCCHC2
ZFAS1
ZFP161
ZFYVE16
ZMAT3
ZMIZ2
ZMYND8
ZNF225
ZNF395
ZNF443
ZNF503
ZNF581
ZNF638
ZNF652
ZNF672
ZNF691
ZNF692
ZNF702P
ZNF823
ZNF830
ZNFX1
ZNRF2
CSF3
IFNA1
CEP72
IL3
IL2RA
VIM
HSPB1
BIRC5
ANXA5
HIF1A
PNPLA3
TOP1
SLC22A3
KMT2A
BCL6
ABCB11
CCND1
B2M
IFNA2
TP73
IFNB1
DCK
WT1
RECK
RAF1
ODC1
TXN
POMC
CRAT
KIT
NCAM1
YBX1
IGF1R
XIAP
MAD2L1
MAP2
PTHLH
PRKCA
BRCA1
PTEN
AFP
PLA2G6
MAP2K4
RPSA
CCNA2
BAG1
BMP6
ALDH1A1
SLC19A1
BRCA2
HSF1
E2F1
CGB5
CGB3
ADA
TOP2B
CALCA
SYK
ADAMTS13
TAT
ERCC2
ERCC1
DICER1
CXCL12
BTK
MAPK3
F8
ACTG1
GATA3
GSTA1
NOTCH3
FGF2
TRAF3
ATF4
ABL1
BCR
PDGFRB
KLK3
EFS
CD19
SHH
SLCO1B1
TUBB2A
BMP7
RALBP1
SLCO1B3
CYP3A7
DROSHA
DOK5
MAP7
CKAP2
MAP10
LINC00251
CEP72-DT
FCGR3A
MPO
FOXP3
MAPK8
NTRK3
TNFRSF8
ALB
BCL2L11
BBC3
IRF4
STAT3
MIR99A
MIR125B1
MIR125B2
CASP9
PCNA
CD7
RHOA
FCGR2A
EGFR
PROM1
NES
JAK3
PMAIP1
GFER
CYB5A
BATF2
PTBP1
JUNB
PGPEP1
DES
ETV6
ARHGEF2
CLIC1
SARM1
ASNS
IDO1
CPT1C
IDH1
PTPN6
DBN1
JAK2
GALNS
EGR2
MEG3
NFKBIA
PIK3CA
SOD1
ATP7B
ARF4
MIR100
IL4
BDNF
BCL2L12
CA9
MBP
MAPT
MYB
WNT5A
APOA1
TP63
NMNAT1
PTK2
SIRT3
CD27
ITGAX
ALDH3A1
DFFB
HES1
AREG
ZFP36
ITFG1
XIST
MIR204
MIR146B
MIR133A1
MIR584
MIR320D1
C19orf48
IL10
CD4
CCND2
CNTN2
CCR6
CCR4
CTLA4
PRDM16
BCL11B
CADM1
JUND
EPC1
PDLIM2
SPOCK3
CYCS
ACTC1
MIR143
PTGS1
MAPK1
MTNR1B
APTX
RAD54B
SMU1
PLEKHF2
NDUFAF6
ETAA1
TMEM215
ANXA2P2
B4GALT1-AS1
LINC01828
LINC01628
MIR3150BHG
ENSG00000253878
RNU6-1209P
NDUFB11P1
RPL7AP57
ENSG00000249650
lnc-C1D-14
RF00017-6710
HSALNG0039468
lnc-APTX-4
HSALNG0067064
HSALNG0070740
piR-38580-356
LOC105374608
ENSG00000236796
RF00017-7002
piR-50286
MAPK14
XBP1
MME
MS4A1
GSTT1
EPO
MTOR
CDKN1B
DNAH8
PDGFB
MB
ERBB2
CXCR4
MMP9
NFKB1
TWIST1
GZMB
SNAI2
BID
MDM4
PIK3CG
TPMT
TIA1
PGR
ENO2
CFTR
SRC
KITLG
SLC20A2
CD34
PTPRG
NDRG4
ICA1L
CARMIL2
MTHFR
MMP2
LIMK1
PTGS2
CD5
KDR
TGFB1
BAD
HSPA4
MYD88
TNFRSF1A
EZH2
ALK
MMP1
PLK1
CRP
IGH
ITGB1
RPS13
MIR34A
SYP
KCNH2
ATP1A2
PRKCB
STMN1
PPARG
RUNX1
IL2RB
ATM
NOTCH1
PDCD1
TNFSF13B
DNTT
BAG4
MLH1
INS
FGFR3
BUB1B
AIFM1
RIPK1
ADAM9
YWHAZ
CD59
TIMP3
CD33
XRCC1
SOCS1
NAGLU
PPP2R3C
IFI27
MIR126
KAT5
TGIF1
CYBA
SEPTIN9
CREB1
TUBA1A
LIMK2
APAF1
HSP90AA1
FCER2
FOSL1
MIR647
ANPEP
GAPDH
CD46
AICDA
FBXW7
HLA-G
IGFBP3
CD47
IL1A
DCTN2
LMO2
MIR21
MIR224
CSF1R
TERT
NR3C1
CASP2
SLC2A3
ETS1
LMNB1
SDHB
CACNA2D1
CD40LG
FYN
PAX3
ABCC8
FPGS
ING1
LCP1
BOK
UGT1A1
SERPINC1
HTR3A
MYOT
EP300
EGF
RARB
POR
TF
MAPK9
CCND3
IKZF1
FADD
PITX2
TUBB1
STAT5A
CLN3
SLC22A2
RPS6
BLMH
CDX2
CCNG1
CD163
GPT
RGS6
S100A6
RND3
FRZB
PDZK1
MYOG
RPL23
OXA1L
USO1
DEPDC1
INTS10
JAK1
MET
IDH2
PLAU
GSK3B
PTPRC
SPARC
STAT6
CDC25C
DAPK1
HCK
MST1R
LPL
SLC16A1
PRKCI
WNT7A
DLG4
ASS1
GPHN
ACTN2
BACE1
MYOD1
TNFRSF1B
RYR1
ALPP
ATF2
FOLR1
CR1
EIF4EBP1
PARK7
NRG1
TK1
VHL
BCL10
CIITA
APOC2
MUTYH
MTHFD1
S100A10
RPA2
PRF1
APOC3
TFF1
SERPINF2
XRCC4
IL9
CD74
DLGAP1
MTRR
PRL
TNFRSF13C
CCT3
HIP1R
PCBP1
MAP4
SST
ATP11A
FCGR1A
CXCL13
MARCO
TEP1
RCOR1
TFPI2
S100A1
NEK4
ATP8B1
POLR3K
BIRC7
PRAME
SRSF11
IL9R
MCRS1
ART1
SGO1
PDAP1
MT-CYB
NCR3LG1
DUX4
UCA1
MIRLET7B
MIR222
MIR101-1
MIR101-2
TRB
MIR1284
LOC117204000
LOC107963951
LOC107980440
LOC117204001
RRM2B
NF1
LBR
IL2RG
SMPD1
F5
TCF3
GMPS
TRAF2
CGA
TNFRSF6B
CRLF2
PCSK1N
MIR27A
MIR15B
MIR508
MIR10396A
MIR10398
MIR10399
MIR10392
MIR10393
MIR10394
MIR10396B
MIR10400
MIR10397
BSG
BACH2
RAB6C
FGFR1
MAP2K1
BRAF
DNMT1
CTSD
FLT4
KRAS
HDAC6
MMP3
ACTN1
IRAK1
HDAC3
MMP13
PSEN2
RARA
AGT
EIF4E
PBX1
SIRT1
SMARCA4
SPTAN1
ZEB1
CARD11
ACP5
CDKN2B
FGA
EDN1
PAX5
TLR7
TNFRSF11B
XPO1
EHMT2
ADORA2A
GP1BA
CD79A
HSP90B1
HSPG2
NME1
NPY
TGM1
BLVRA
ANG
CCR7
FLNC
KLF4
CD38
FTO
FOXP2
TBL1XR1
SELP
SPTA1
SLIT2
PRDM1
TNFRSF10A
AMD1
GAL
LGALS3
INHBA
TFE3
APOH
IL18
IL12B
IGFBP2
HAVCR2
NUP98
TCL1A
TIMP2
SIRPA
ANXA6
KIF2A
FABP2
ETS2
NR2E3
UBE2Q2
BGLAP
LGALS3BP
NMUR1
MNDA
MICB
SYNE1
SIGLEC7
TNFSF14
PDCD1LG2
RUNX1T1
SETD1A
PCSK2
CD99
ZMYM2
AFF1
PENK
SCG5
BRMS1
CD52
NOP2
GPR21
JPH4
CGB7
FAM215A
MIR16-1
MIR27B
MIR182
MIR23B
MIR16-2
MIR874
MIR15A
DUX4L1
TAS2R64P
TP53COR1
MIR10395
MIR10401
MFN2
RARG
PIN1
NEFL
IGFBP7
KARS1
GSR
KIF1B
RICTOR
NDRG1
GDAP1
HMMR
GAST
PPIG
DMTF1
RTL10
ERBB4
PDGFRA
PIK3CD
AKT3
AR
FLT3
NTRK2
PIK3R1
ESR2
PIK3CB
PIK3C3
RAB7A
PGK1
AKR1B1
HSPA8
L1CAM
PAX2
MUC1
PIK3C2B
SLC22A5
SPHK1
SLC5A6
CYP1A2
FKBP5
ITGA2
VDAC1
DYNC1H1
DKK1
PDIA3
PIK3C2G
SGPL1
S100B
SPHK2
BCL2L2
FIG4
HSPB8
HAT1
LITAF
MTMR2
FGD4
PYY
SLC31A1
ATP6V0C
NOX4
CERS1
RAB6A
MED25
PRX
LRSAM1
ZNF143
DNAJC10
GARS1
RLN2
AARS1
MT-CO2
MALAT1
TP73-AS1
CDK4
IKBKB
RAD51
COMT
AXL
NOS3
MAPK10
CASP7
CALR
CHEK1
HK1
FZD4
G6PD
ITGB2
MERTK
RPS6KA1
CYP1B1
BMP4
F10
FLI1
CYP1A1
CDC34
CDC25A
CYP24A1
HSPA9
JUP
LEP
PC
MALT1
PNP
PRMT1
SLC18A2
TNFSF11
PRKAA1
VEGFC
TGM2
YY1
ATP2A3
CD79B
ELANE
FEN1
LIFR
ITGAL
SLC5A5
SFN
WNT1
TRPM4
DGUOK
ADCY10
EWSR1
EIF2S1
OCLN
KRT19
TXN2
DSG1
CANX
CLOCK
IL10RB
IL5
IL13
HP
PSMB5
PDE3B
LTF
TNFSF13
DHTKD1
DNAJB2
AKR1C1
CIC
ARHGDIB
IDUA
CD9
FZR1
LAP3
PKMYT1
PRPF4
TAC1
TSPO
SPI1
TAGLN
USF1
AMBP
CHGA
CCL7
ICAM3
IGHMBP2
EIF3A
OSM
NTF3
NCL
KAT8
MXI1
NFKBIB
SBF1
SRSF1
UBA7
DPP7
ATP6V1C1
ANAPC1
IL11
CD37
HMGB2
PPL
PAWR
[truncated: 44 more rows]

## Sheet: Polydatin
Polydatin-related
AKR1B1
TYR
ADORA2A
SLC5A1
MMP1
MMP7
MMP8
SLC5A4
SLC5A2
ADORA3
SLC29A1
CXCL8
TGFA
CXCL10
CCL2
IFNG
AGT
TNF
EGFR
GLI1
MAPK1
MAPK3
NFE2L2
RELA
SOD2
BCL2
CAT
NPPA
NQO1
TSHR
AHR
CCND1
CCND2
CYBB
HLCS
IL6
KEAP1
MAPK7
NOX4
PARK
PARK7
PPP1R12A
PRKN
PTGS2
ABCC2
ABCG2
ARNT
ATG5
CYP1A1
ESR2
G6PD
IL1B
IL4
LCT
MFN2
MTOR
MYH7
NTS
ORAI1
OVAL
PDE5A
PPARGC1B
PTGS1
RHOA
SHH
SIRT1
SLC22A1
SLC22A12
SLC22A4
SLC22A5
SLC22A6
SLC2A9
SQSTM1
TGFB1
TP53
TUG1
UGT1A1
ULK1
UMOD

## Sheet: NP
NP-related
TNF
IL12B
TAC1
CXCR4
CYP17A1
GAL
HMGB1
NTRK1
GFRA1
CACNA2D1
AGER
HTR2C
PRKG1
OPRM1
SCN9A
GRM5
CXCL8
MIR135B
CXCR2
SCN8A
SCN10A
GRK1
TNFSF8
MIR135A-2
MIR344F
MIR208A
MIR7688
CASP3
IL1B
IL6
BCL2
AKT1
MAPK1
CAT
ABCB1
PTGS2
MAPK3
RELA
NOS2
VEGFA
BAX
IFNG
HMOX1
ICAM1
TGFB1
JUN
FOS
CYP3A4
IL1A
FAS
SOD2
CASP9
NFKBIA
BDNF
CASP8
SREBF1
NFE2L2
CCL2
CDKN1A
MAPK8
BCL2L1
GSK3B
TP53
STAT3
GADD45A
TIMP1
CYP2E1
NR3C1
SERPINE1
CCND1
POR
CEBPB
ERN1
PPP1R15A
ABCB1A
IL1RN
CDKN1B
DDIT3
MPO
CYP2C9
CPT1A
TH
UCP2
IL10
MAPK14
TLR4
IL4
STAT1
CCN2
ADIPOQ
CYP2D6
CXCL1
GFAP
CYP3A23-3A1
CREB1
SGK1
HIF1A
BAD
HSPA5
CYP1A1
NPY
ALB
ASNS
NQO1
TRIB3
CCL5
NGF
ABCC2
EGR1
MYC
CEBPA
CTNNB1
NFKB1
PPARGC1A
FOXO1
TNFRSF1A
CASP6
EIF2AK3
CASP1
SOD1
ACACA
SPARC
FABP4
COL1A1
ABCG2
CDH1
GSR
VCAM1
NUPR1
ATF3
LPL
TNFSF10
GSTP1
TNFRSF11B
PPARA
COL4A1
BNIP3
PPARG
HMGCS1
SREBF2
CYBB
ALDH1A1
CD36
EPHX1
CLU
TNFAIP3
MGLL
ESR1
UGT1A1
GOT1
CXCL10
GPT
VIM
CYCS
FASLG
MKI67
NOS1
AGT
MMP3
TXNIP
CD14
CDK2
EIF4EBP1
NREP
DUSP1
IL2
IL1R1
AIFM1
CYBA
MSMO1
IGF1
ACTA2
CYP2C19
PTEN
IGF1R
HRAS
C1QA
PARP1
TNFRSF10B
NRP1
CTH
FN1
NR1I2
IRF7
GNAI2
HSPD1
CYP3A11
GSTM1
BECN1
RRM2
CSF1
EIF2S1
ABCA1
ABCC1
IL12A
TRPV1
CCNA2
ID2
MAP3K7
FASN
VCAN
ATG5
TK1
UCP3
XIAP
ACE2
EPO
BAK1
IGFBP4
ANGPTL4
SQSTM1
BDKRB1
HSPB1
NTRK2
EDN1
NR1H4
FADS1
BCL3
INHBE
MAPK9
ACKR3
CAV1
CYP1A2
FDFT1
KLF6
GPD2
CXCL2
LITAF
NT5E
HMGCR
PRKAA1
SPP1
IDI1
COL3A1
SRXN1
ERO1A
ID3
HSPA2
PLD1
GCK
IGFBP3
S100A9
POMC
BIRC3
S100A8
NOS3
THBS1
CCL3
KCNH2
EPHX2
IGFBP1
ACHE
ID1
TYMP
BMP6
LGALS1
LBP
PLAT
NOX4
VDAC1
MAFF
NR0B2
VLDLR
NPPB
INS1
FGFR1
ME1
TLR2
BTG2
PIK3R1
SCD
MAP1LC3B
ZFP36
SOCS3
CPPED1
MMP9
NAMPT
MCL1
TRP53
IRS1
CCNB1
CASP2
IGFBP5
LCN2
CTSL
GBP1
NRF1
SLC2A3
GRIN1
SLC6A6
RAC1
ITGAM
PRKACA
CYP1B1
BCL2L11
HMOX2
TAGLN
GSTM2
NASP
SLC2A2
CP
CALR
KDR
EMP1
IFI44
IL5
MAP2K1
UGT2B1
TRAF1
PTK2
SQLE
IL18
MDM2
POLA1
CDKN2C
PCNA
COL1A2
SERPINE2
RB1
MMP2
P4HA1
PRKCB
BMP2
NABP1
SLC22A2
DEPP1
JUNB
GCLC
CFLAR
FABP1
SLC22A4
CYP3A5
HSD17B4
NDE1
HSP90B1
NDUFB8
AKT2
ANXA1
SLC22A5
CASP7
SULT1A1
CDC42EP3
CNR1
CITED2
HMGB2
E2F1
FANCG
MAP2K6
BDH1
LAMB1
DRD2
THBD
ATF5
CHAC1
G6PC1
NLRP3
PPL
ATF4
CYP2B1
APAF1
XBP1
ALDH2
CCN1
TTR
EGFR
CALCA
TSC22D1
CCL6
SLC16A1
AHR
GBP2
GRIN2B
PDK1
ABCB4
APOE
GSTA1
TOP2A
PRKCD
OAT
PDGFRA
MTOR
TGFB2
PYCARD
GCNT2
PPP1CB
ZMYND8
MVP
HMGCS2
MAP3K1
TNFRSF9
ERCC4
TRIM13
CCND2
TIMP2
KLF2
CD68
NR1I3
CENPU
ABCB1B
GPD1
PLA2G2A
LXN
MBP
MAOA
FOSL1
SMAD3
FUBP1
ITGAL
IVNS1ABP
MKNK2
RORC
CNR2
LDHB
FLT1
DDIT4
MAPT
MED31
SKP2
CDK1
RAD51
PRKCA
GADD45G
GPX4
NR2F1
UQCRC1
NFKBIB
FHL2
NID1
GPX1
SMAD7
SPHK1
TSC22D3
STMN1
HRH1
MARCKS
ABCC3
CHUK
SCD1
IL3
MAOB
ATF6
TP53INP1
GAS6
IL6ST
ABCC4
SLC2A6
C1QC
CX3CL1
PER1
HSD11B1
BARD1
BIRC5
DPP4
FKBP5
MPZ
SUB1
HSPE1
CYP7A1
LDHA
KLF5
IL7
IL33
FOSL2
JAK1
TMPRSS2
TENM2
CRYAB
CYP2C11
MYD88
UCP1
TXN
HP
CDKN2A
ODC1
SLC7A11
BCL6
GAD1
MFAP5
GLUL
NCF1
PRLR
SLPI
RRM2B
IER3
MT1A
SUV39H1
ADORA2A
TGFBI
MMP13
AR
H2AX
COL6A3
MGMT
RPS6KB1
ENPP2
AREG
GSTA2
MAP2
PKLR
TFAM
CPT2
CYP2B6
PDE4B
ROCK1
SNAI2
ADCY1
HSD17B12
PPP1R14B
G6PD
PC
SELE
TUBA1C
XDH
COL15A1
GJA1
FOXP1
IRS2
ISG15
TYMS
CXCL9
FANCD2
GADD45B
IFI44L
TRA2A
SAT1
ANGPT1
ARG1
GAS2
NDUFS1
ANXA3
G0S2
HSPA1A
BMP4
CKB
GDF15
IRF1
TNFAIP2
DRD1
F2R
TRAF4
C3
IL7R
RHOB
S100A4
ADCY9
PHLDA1
CCR5
COX4I1
IRAK1
VASP
DNMT1
IKBKB
AADAT
PATJ
ST13
CSF2
KLHL24
SERPINF1
SORL1
EGR2
AKR1C3
LONP1
LEP
STAT6
GABRB2
PRKCZ
SLC25A1
NR1H3
COL5A2
ABCG8
CD38
ITGAV
JUND
GLA
NFE2L1
OGN
PHLDA3
SLC12A2
ELP2
C1QB
ACE
IL4R
MRPS18B
ANXA5
SLC22A1
PDIA6
SLC25A20
PTGS1
ING2
ACLY
CYP2C8
KAZALD1
JMJD1C
PLA1A
CCNF
CASP4
SESN1
CREBBP
HSD11B2
PLA2G4A
MR1
HSP90AA1
CTSD
CCNE1
CLDN1
KLF4
SLC22A7
SIRT1
CD44
SULT2A6
KCMF1
IL23A
RPS6KA5
SFPQ
TGFA
BMP7
GRIA1
EGFL6
NDUFS2
INSR
SNAI1
PPP3R1
ETS1
MGST1
RASD1
EIF1AX
FNDC4
LEPR
STRIP2
EPOR
SLC10A2
PECAM1
STIP1
LOX
CHD1L
TIMP3
DAPK1
TUBB2A
CMTM6
GART
EGF
PLCB1
PLAU
CELF2
NINJ1
CXCL12
CEBPD
F3
BRCA2
DIABLO
UNG
ENDOG
EZH2
FGF21
TXNRD1
DMXL2
NRAP
ACAT1
NUSAP1
CTSS
FBXO32
HAVCR1
GOT2
ANXA4
E2F8
PLIN2
GAPDH
BCL10
PSAP
VEGFD
WSB1
BUB1B
HSPA9
ADM
BRCA1
MMP1
ATG12
CDCA7
SAT2
TTLL11
PPARD
HSD3B2
SMPD1
EIF1
STAT2
SLCO1A1
CD83
LY6E
OLFML3
CBS
RPUSD2
IFIH1
VPS13A
COL2A1
GHR
HBEGF
PIR
VDR
TFRC
WIPI1
ANXA6
IL17A
ATP1B1
ORM1
BAG3
FADD
IL24
PRL
TJP1
CCNB2
CTSK
MSH3
OGA
CREM
ATP2B4
MAP4K4
SMC4
THBS2
LDLR
BTG1
CTTNBP2NL
NAPEPLD
FOXA1
GRB10
CDK6
CYP4F2
NMB
PANX1
TEK
CBR1
FLCN
RBM3
SLC4A4
TRAF6
CENPF
GPNMB
GSTCD
PIK3R2
CAPN6
FGF2
JAK2
PDK4
PENK
FOXA2
IFI27
ABCG5
HNF4A
AGO2
CROT
NDUFB2
PPP1R12A
SLC17A5
TRAFD1
ADAMTS1
SLC2A1
ADIPOR2
CXCL11
EIF2A
TUBA1A
CHEK1
H2BC5
CAMK2D
RACK1
TCF7L2
CES2
DNM1L
IGFBP2
CCR3
PCLAF
RBL2
SLC25A4
TCF19
TFAP2A
CYB5A
PM20D2
FBXO5
PDK3
GCLM
CEACAM1
DUT
OPA1
PTPRF
ERBB2
PRDM4
INTS3
RAF1
SLC43A1
SNCA
DHCR24
NCOA3
AQP3
CYC1
MED13L
PRKCE
NFAT5
INSIG1
PRNP
SENP5
JCHAIN
LHB
GPAT3
POSTN
PSAT1
TNFSF9
AKR1B7
ANK1
HPN
ELMOD3
SLC2A4
ALAS1
THRSP
ALPL
IGF2BP3
LARP1B
PER2
AGTR1
BCHE
CENPE
SLC6A18
CDK4
FH
ITPR1
ASAP1
PAK2
RFTN1
DECR1
MVK
PHLDA2
RND1
CD274
STC1
GASK1B
PDGFA
PIM3
BID
ETS2
LMNA
RUNX2
TNFRSF12A
ANGPTL6
FKBP1B
SEL1L
PCSK9
ABCB11
MT2A
COL6A1
ISG20
NSDHL
PNISR
FLRT2
H2BC21
NUDT4
POU2F1
TRPV2
CCL4
HTRA1
CRP
DBT
PRDX2
RBP4
ATRX
PINK1
ATP2A2
ETFDH
KCNN2
PRDM16
SPARCL1
NEDD1
POLR1E
LGALS3
SESN2
SOX9
AACS
GNAI3
TANK
AGTR1A
CD86
GCG
HSPH1
LSS
BDKRB2
BGLAP
GUSB
ICE2
IFIT3
SLC1A4
SULF2
IFI35
LTBP2
ZNF552
SLC29A1
APLP2
CALU
CDC20
CYP51A1
RPA2
ENTPD4
TGFBR2
CCL8
MCM7
SH3BP5
SLC1A1
BIRC2
CCNG1
CAMK2A
HSPA8
PLPP3
PPP3CA
RORA
TBC1D4
GSK3A
OAS1
SOS1
HOOK1
MIR150
MTA3
NIF3L1
NUDCD1
MMP10
NES
RGS4
SPTBN1
TRPA1
CSRP3
DLK1
H6PD
NAV3
SNX10
CCL20
IL1R2
LBR
AXL
BBS4
MTHFD2
PATL1
BCL2L2
CASP12
PDHB
XRCC6
REN
FSHB
NPPA
DIAPH3
GPC3
PDGFRB
PFKL
RARRES2
ACP5
ADA
C1S
COL18A1
PRDX3
INPP5F
MLX
RBM17
PRC1
SOX4
SAA3
SERPINA3N
RHOA
IFIT1
MMP12
APP
FOXK2
VTI1A
ANTXR1
FAM83D
SLC30A1
FAM43A
HTR3A
MUCL1
TTI1
ZNF574
NDUFB4
DISP1
CHI3L1
DFFA
EDEM1
GLS2
LAMB2
TPD52
VDAC2
BBOX1
CYP8B1
IL6R
KIF20A
SCN5A
SFN
SORD
IL1RL1
APOB
GPX3
UGT1A6
ACOX2
ASL
CLDN11
HSDL2
NNT
TLR1
TNFSF11
STC2
DCAF8
FOXO3
ARPP19
CD81
CFB
COX1
MFN2
SGMS1
UGT2B7
PKM
TF
WEE1
BASP1
CBLB
ETFA
FSCN1
AGTRAP
CERS5
OCLN
PHF1
SRC
ABCC5
AIF1
ALPK1
DCN
PHKA2
UCHL1
GZMB
HILPDA
LRRFIP1
RAMP1
ST3GAL1
PBK
CYP2A6
CYP2B10
CD74
EFNA1
NFKB2
TNFAIP1
ACBD5
ADCY8
CCT2
METRN
MRTFA
MX2
VWCE
EIF4A2
ESR2
SORBS1
PLAUR
ERRFI1
CALB1
PGRMC1
DMTF1
BUB3
SCUBE2
RPS6
SOCS2
TNFRSF10A
FZD2
PGM1
PYGM
SRGN
NR3C2
FZD7
NT5C2
SPSB1
ATG10
DNMBP
SKA2
ZCCHC2
CYP27A1
DUSP6
B2M
RIPK2
ELF3
CPSF6
DNAJC6
FAM189A2
POLR1C
TLK1
CARD14
IFT43
ISYNA1
LMCD1
METTL7A
PLXNA2
NDRG1
COX2
LOXL1
RBL1
RPS6KA1
CCL11
FTH1
LCP2
MRPL50
TPI1
EIF4G3
RAPGEF5
GABRA1
FASL
BBC3
APOA4
MAP3K5
MME
PRDX1
SMARCA5
SOX13
ITGA3
TNFRSF25
KLF15
MCAM
CDH2
GSN
GRIN2A
TGFB3
HBP1
MACROH2A1
GOLM1
MXRA8
RFLNB
TBL1X
TEAD4
TP53INP2
TSPO
PDPK1
ALDH1L2
CD69
AQP1
ATF2
KLF9
PIK3CA
ATG4B
CXCL6
GALNT16
IGSF1
LDLRAD4
NETO2
ODF2
SIN3A
STK17A
HES6
HNRNPD
GSTA4
ASS1
COL4A2
GHRL
GLO1
CCAR1
DDB1
ENO2
KAT6B
NFIL3
PLCD4
SOD3
FEZ2
AGTR2
COL6A2
PROCR
PTGER2
SAA1
SLC2A4RG
GCH1
ANKRD1
FKBP1A
HERC6
NDUFA3
RFX5
THNSL2
UBE2T
ZFP36L1
CDKN1C
MLLT3
RNF19A
SLC28A2
TMED3
AGPAT4
NME3
PFAS
RPN1
TIGAR
CAV2
DCLK1
DDX58
HOMER1
NR2F2
YWHAE
CLK1
DLD
GLUD1
IGFBP7
NPHS2
ABHD3
MAPK7
PBX3
PLA2G4C
POLH
REV3L
SELENOP
SDC2
SLC2A5
HAMP
HTR2A
PLK4
A2M
CBX3
PKDCC
RRAGC
SYT7
TNC
AIM2
DMAC1
ELOVL6
FABP7
HSPA1L
RETN
RAC2
TNNI3
CD5L
CNBP
CYP46A1
E2F5
CD151
COX15
EHHADH
RFC1
NR4A1
CYP26A1
DHFR
BIK
CYP3A7
HIPK2
LY96
CYP3A65
CSTF3
EDNRA
GNG2
PRR3
IFT46
SLC7A6
TMTC4
PAWR
SMAD4
ACADL
IL13RA1
ULK1
DNAJB1
CDK9
GOLGA4
IRX3
MANBA
NIN
PKP4
SH3GLB1
ABCD3
IDH3A
TNFRSF19
IFIT2
FANCF
PSMF1
TASOR2
GCKR
CYP4A1
KCNA5
PDP2
PIP4K2A
SELL
BCAT1
COL12A1
FDPS
DCXR
EIF5
LUM
ADAMTS4
POLD3
PSPC1
RARA
RIPK1
DNAJB14
LCAT
LIG1
NDRG2
RACGAP1
SHC1
AURKA
TPM1
CYP2C29
ELK3
GRIA2
OASL
PHIP
SCN1B
ABI3BP
MAT2A
SDC1
SERPING1
UGT1A9
MIF
CDCA3
ZFAND2A
GYS1
GSTA3
HS2ST1
NEUROG1
TMEM267
CAR3
DDAH1
GEM
INSIG2
MXD1
LIF
BLVRB
NR4A2
SLC7A5
DTX4
EBI3
LIFR
MCCC2
SRI
TMBIM1
TUBB6
EDNRB
ITGA2
BHLHE40
HPGDS
IGKC
ARHGAP26
ARL6IP5
BRINP3
COX6A2
MMP16
PTPRN
RPL5
TAF3
TIMM10B
JKAMP
DUSP10
EBP
MX1
PMS1
RAD54B
SERINC3
SLC44A1
UBC
UBE2B
ACSL3
ATP7A
B3GALNT2
CBFA2T2
MORF4L1
PLK3
SH2D2A
SOCS1
METTL16
VEZT
DEPDC1
GAB1
NAA15
PEA15
SMOC2
TACC2
ACTN1
AFP
DNAJC3
RCAN1
TMPO
VCL
FBP2
INHBB
PDX1
PIK3C2A
TCF12
ZEB2
KNG1
ATP6V0E1
CCDC186
FASTKD5
SOCS7
ACSL4
NCF2
TRMT12
ARHGAP5
CAMK1D
CHCHD10
CNN2
FCGR3
SMIM14
CCND3
AKR1A1
CDC42
MAD2L1
ZNF304
RGN
ENO3
HEXB
PPP2R2A
SERPINB8
SLC46A3
TRPV6
AKR1B1
MT2
EFCAB7
EIF2B1
LSM14A
SLC9A9
TIGD2
MRC1
PRKDC
RELN
FBLIM1
GFPT1
OSBPL3
PRKAB1
TNFSF4
ACO2
SLC6A9
SLCO1A4
TFPI
CYP2A1
ZNF207
CD200
GPAM
IL17RB
MCMBP
PMP22
PYGL
S100B
SERPINH1
AGPAT3
CLEC3B
COG3
COQ8A
PSMD7
RHOQ
CD40
BCL2A1
LIPG
HIBCH
KNTC1
PXDN
RAMP2
WDHD1
HSP90AB1
HSPB3
CTC1
FEM1B
FRS2
MED17
NSMCE4A
PAXIP1
TBC1D17
TSPAN14
VPS36
MIR21
P2RX4
RAD54L
UPP1
ASPA
CEMIP2
PRKN
KIF23
HTR1B
ITGB1
AIFM2
AMIGO2
AP1S1
DTYMK
GFRA2
GPC1
HLF
PSMB6
ZBTB10
GPCPD1
LYZ2
RFC5
ASPM
GRN
MDH1
PDIA4
PTP4A1
S100A11
TKT
EVC
ZYG11B
CALM1
MMP7
SLC18A2
XRCC1
FNDC3B
LAPTM5
RBBP6
SLC25A30
UCK2
NR1D2
CD82
DDR1
JADE1
MAPKAP1
NDUFB7
RGL1
SCPEP1
STX3
CSTF1
DHX36
IFT20
REPS1
YAF2
DKK1
SLC3A2
OSGIN1
ADCY6
AFF4
FBN1
GRB14
GYS2
NUCKS1
ORM2
TBK1
TP53I3
KDELR3
PDGFRL
HBB
KIF11
PHB
PPP1R3C
BTRC
KLHL23
MFSD1
SAMSN1
SLC49A4
TMEFF1
ELP1
MYO5A
PCBP3
QTRT1
CSTA
AVP
HSPA1B
RND3
CD55
CD80
COL5A1
FAM162A
HPCAL1
PIGA
RBBP8
SOX18
TAX1BP3
IVD
SPRY1
TRIM8
COQ9
ENTPD7
GPATCH2
HSPA14
SLC22A3
SLITRK5
SYP
SP1
PRKAR2B
TRPV4
VEGFB
FNBP1
PLAAT3
CD9
INS
CYP7B1
FYN
SLC23A2
TLR7
CSTF2
MAP4K3
ALS2CL
GOLGA8A
SNTB2
EEF1A1
NPM1
VEGFC
ANP32E
CBL
STOM
DGAT2
ENO1
CNOT6L
FAM13B
HYLS1
IBTK
TUBB3
XPNPEP3
AAMDC
CARHSP1
GRK5
KCTD10
NDN
SLC15A4
TLR6
UQCRC2
SPART
CDC6
CALB2
CCNL1
HOPX
KCNJ8
NFKBIE
SDHB
SLC4A7
HNRNPA3
ECH1
MOG
IL3RA
NAIP
NDUFB11
LRRC8A
MIB1
PLA2G15
PLCXD1
RNF44
PLAAT4
SHC3
ALDOC
CA12
CACNA1H
FERMT2
HPGD
MTR
NBN
RPA1
TYROBP
FGFR3
OXCT1
RBPMS
TMSB10
C1QTNF1
CREB3
CSF1R
HTR1A
IDH1
NSUN2
POLE3
ANP32A
APLN
HAO2
PDCD4
RPS19
SULF1
GATA3
S100A6
WDR47
CCDC50
CERT1
FANCL
FBXO22
RAB26
SLC16A2
SUMF1
TRIP6
MCRIP2
PFKFB4
GLRX
E2F3
EPCAM
INPP5D
MAL
SLC25A10
SLC5A3
HIGD1A
RT1-S3
USP12
ZDHHC23
CCDC85A
PLXNA3
RNF138
SMURF1
ACAT2
ANKFY1
EBF3
MRPS27
PBRM1
PPP1R18
QSER1
SYNJ1
ABHD2
ELOVL2
F2
KNL1
MFGE8
SLC34A2
SYNE1
ZNF263
EEF2
FGB
GLP1R
SERPINA3
ADCY7
ADRB1
ANKRD37
CHST2
CLASP2
SPTY2D1
STX12
WDFY1
PPP4R3B
PDIA3
STS
AK3
CASP10
LSP1
PDK2
SRM
SYN1
MAPRE3
MAVS
MFNG
ARID4A
ASXL1
BHLHE41
EIF2AK1
KIF15
LAPTM4B
MPC2
MTHFD2L
NRAS
PIP5K1B
PXN
UGGT2
ZNF395
CMTM5
DLG1
GH1
CAAP1
FAM222B
FMO1
NR1D1
ATP5F1A
BOK
E2F7
EEF2K
MYH10
NCAPG
MYLK
PCK2
SLC6A4
TNFAIP6
UBE2C
WDR36
COMMD10
HERC4
MBTD1
MCCC1
NPDC1
SALL2
TRIM38
FMO2
ITGB6
LAMC1
LAMP1
PLSCR1
TNFAIP8
PGK1
FABP5
FST
BCLAF1
FABP2
FSTL1
HPSE
MFN1
NRP2
PVR
ABCA8
CKS1B
MTHFD1L
RFC3
ACYP1
AGPS
CARD6
GBP3
MED13
PKNOX2
SH3YL1
ZNF652
CHD1
CTSF
EPAS1
MDM1
RBM19
VANGL1
CYP3A43
GPT2
RRAS2
TRIM68
CNN1
CXCL5
EPHA4
FAT1
RSRP1
OARD1
PMAIP1
RXRA
CD3E
FAF1
LSM6
P2RX5
ACADM
ARL8B
CYP27B1
EIF4A1
HPDL
NDUFA8
SLC35D1
TNXB
CMBL
KAT2B
MTSS1
NCAPD3
NCAPH
SHMT1
FGA
STAR
BGN
IRAK2
KEAP1
SMAD1
SPRY4
ZFP36L2
SLC1A2
ADCY4
ASCC3
EMG1
GYG1
MAN1C1
MICB
NCOA6
SCAF11
TTYH2
CCNL2
ADAM17
AKR1D1
CHKA
PLK1
SLC9A1
GBE1
ZNF557
C3ORF38
CACNA1B
SLC25A19
TJP2
DNAJC15
LZTFL1
PTPRD
RCOR2
RPS27L
ADPGK
CRH
DAGLB
EP300
FAM110C
MAP2K2
PPP2R5A
UBASH3B
ATP5F1B
EIF5A
PMEPA1
CIDEB
CACNA2D2
CNKSR3
DNAJA3
EYA4
H1-10
LAMA5
LRP10
PID1
USP3
FTMT
UNC5B
C4ORF3
C9ORF85
LRRN4CL
DIS3L
TTLL4
ATP1A2
CCL7
COTL1
GLDC
ANO3
APOA1
PPP5C
RETSAT
DNAJC7
APBB1IP
DEGS1
GALNT7
GBP6
GEMIN4
HNRNPH3
SFXN4
TRIM22
PAK1IP1
TMEM50B
TNKS
CSRNP1
DST
FGF7
MYBL2
NUCB2
CCNG2
MMP14
PLK2
PCK1
ADIPOR1
CCDC6
FOSB
GFI1
MDFIC
NDUFS8
MYO1C
NDUFS3
NUP155
PAN2
PEX19
PRMT3
RFK
ZNF383
ALDOA
C6ORF62
KIFC1
RXRG
TRH
USP18
AQP2
ITGB2
BSCL2
CAMTA1
CLCN5
HIP1R
IL27RA
OSR2
PHF11
TSPAN33
ENPP1
GLB1
NUF2
OGDH
ST6GAL1
TACC3
TGM1
ALOX5AP
CDT1
DNAJB9
INHBA
NOTCH2
BAMBI
EGR3
IFNGR1
MYBL1
EPN2
PDCD5
B4GALT6
CHCHD3
HACD3
HAUS4
IRF2
MYO6
PHKB
POPDC2
SEC63
SH3D19
SIDT2
SOX5
SPIC
UFM1
NOP2
ESRRA
ZNF195
HK2
UGT2A1
TNFSF13
ALDH1B1
DHCR7
NPC1L1
PI4K2B
XCL1
ABCC6
ASB2
ATL2
ATP6V1C1
BNC2
CDR2
CKAP2
LEAP2
RFFL
SDHC
SMOX
TFPI2
SMYD3
PNPLA2
REL
TNFRSF21
CYP3A2
[truncated: 20,539 more rows]

## Sheet: common genes
Intersection genes
ABCC2
BCL2
TNF
SOD2
TP53
CAT
IL6
IL1B
ABCG2
CCL2
NFE2L2
NQO1
RELA
SQSTM1
CXCL10
CXCL8
GLI1
IFNG
NPPA
ORAI1
SLC29A1
CCND1
MAPK3
SHH
RHOA
EGFR
IL4
CCND2
PTGS1
MAPK1
MTOR
PTGS2
TGFB1
MMP1
UGT1A1
PARK7
AGT
SIRT1
ADORA2A
MFN2
ESR2
AKR1B1
SLC22A5
NOX4
G6PD
CYP1A1
